# Supplementary material for: Loss of AMP-Activated Protein Kinase-α2 Impairs the Insulin-Sensitizing Effect of Calorie Restriction in Skeletal Muscle
Source: PubMed Central journal article supplement — Diabetes. 2012 Apr 13;61(5):1051–61. doi: 10.2337/db11-1180 (PMC3331748; doi:10.2337/db11-1180), 2012-04-13

# SUPPLEMENTARY DATA

**Supplementary Table 1.** Primer Sequences and GenBank No.

| Gene            | Primer Sequence                                                         | GenBank No. |
|-----------------|-------------------------------------------------------------------------|-------------|
| AMPK $\alpha$ 2 | Sense: TGGCAGCACTTTGTCCTCG                                              | NM_178143   |
|                 | Anti-sense: CAGCGGGTTCGTTTCATCAG                                        |             |
| PP2C            | Sense: TGTCAATGGCTCTCTGGCTGTATC<br>Anti-sense: ACACTCATGTTGTCTCGACTTCCC | NM_178726   |
| PP2A            | Sense: CCTCTTGTCATCAACAGCCGTG<br>Anti-sense: GCAGGAAGAACCCACAAAGTG      | NM_019411   |
| $\beta$ -actin  | Sense: TGCTGTCCCTGTATGCCTCTG                                            | NM_007393   |
|                 | Anti-sense: GCTGTAGCCACGCTCGGTC                                         |             |

## SUPPLEMENTARY DATA

**Supplementary Figure 1. A:** The relative mRNA levels of AMPK $\alpha$ 1 and AMPK $\alpha$ 2 subunits in skeletal muscle in mice were determined by real-time PCR. The AMPK $\alpha$ 2 is the dominant subunit in skeletal muscle. **B:** Two months of CR did not increase AMPK $\alpha$ 1 protein level. NS, no significance.

**A**

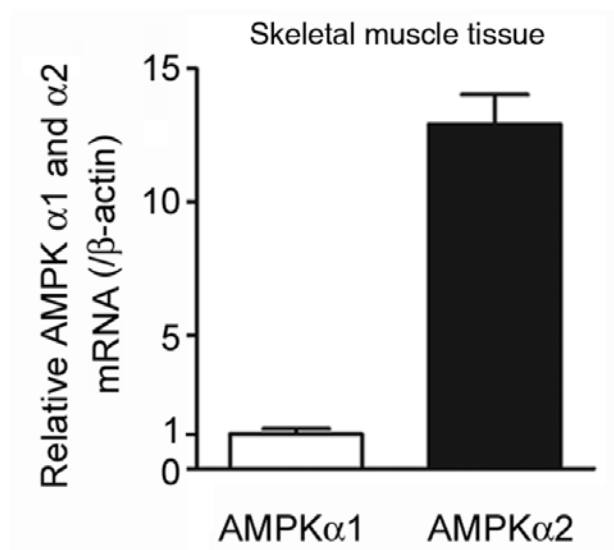

**B**

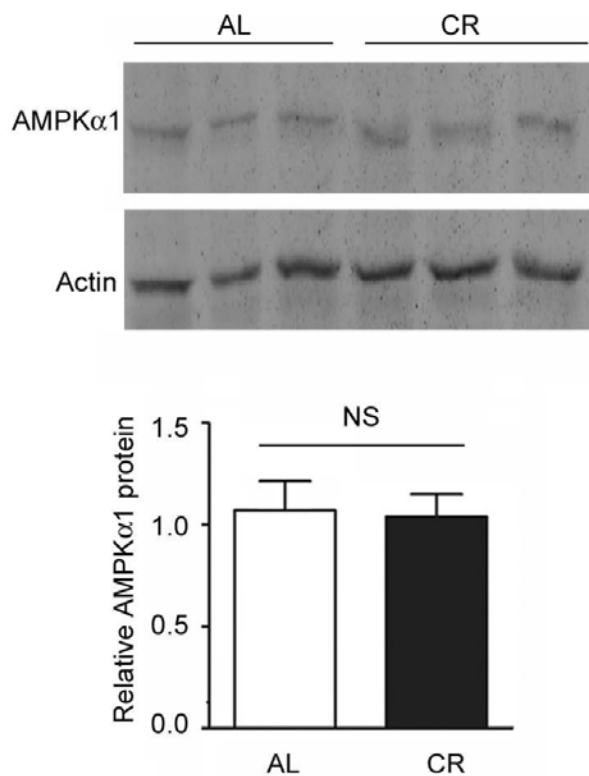

## SUPPLEMENTARY DATA

**Supplementary Figure 2.** CR-induced increase of phosphorylation of insulin receptor (IR)  $\beta$  subunit<sup>Tyr1150/1151</sup> (insulin-like growth factor-1 receptor [IGF-1R]  $\beta$  subunit<sup>Tyr1135/1136</sup>) was not affected in AMPK $\alpha$ 2 mice.

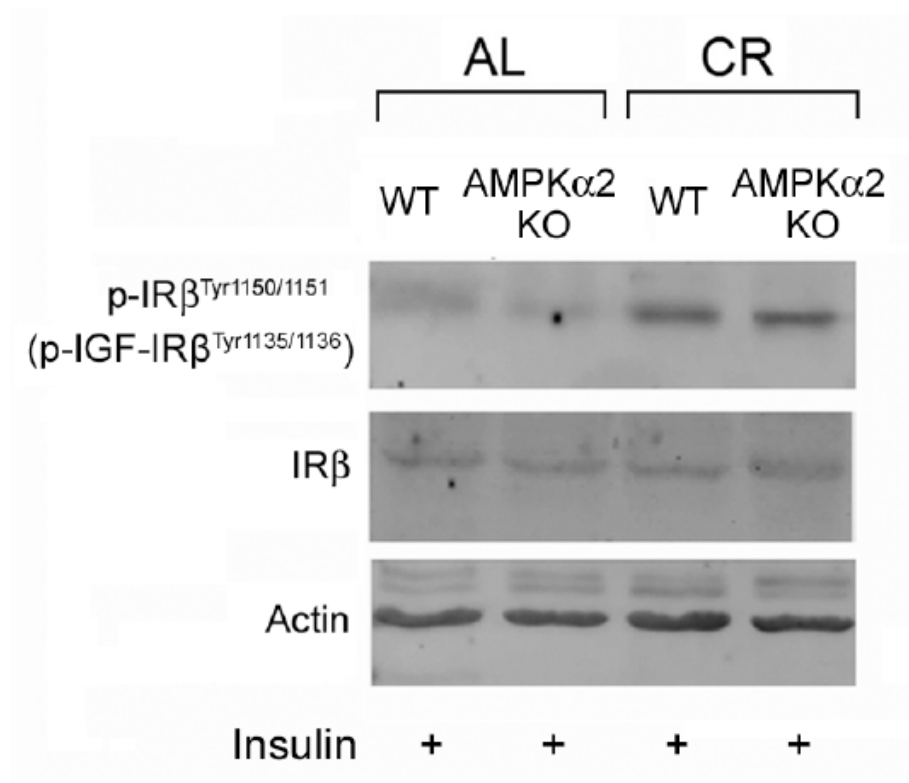

**Supplementary Figure 3.** CR serum increased the total AMPK $\alpha$ 2 and phospho-AMPK $\alpha$ 2 in cultured C2C12 cells.

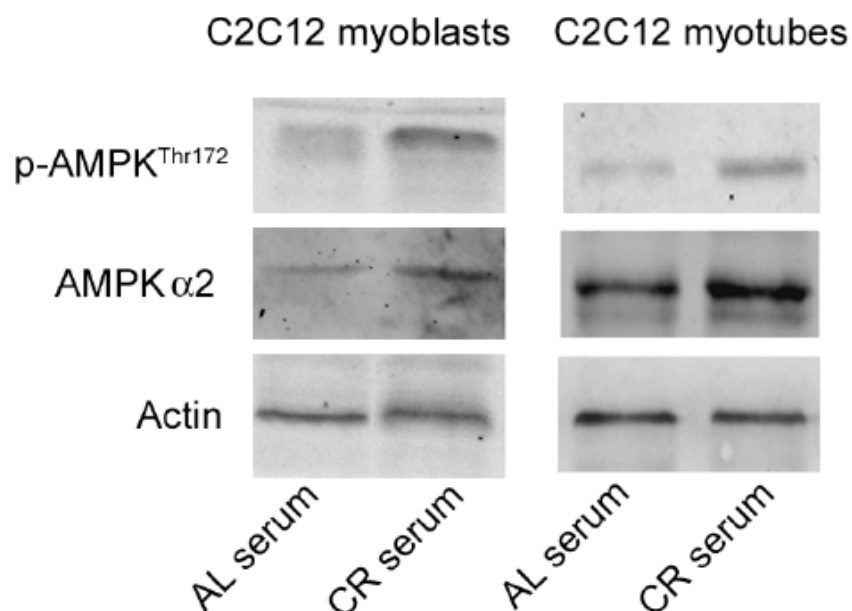

## SUPPLEMENTARY DATA

**Supplementary Figure 4.** Two months of CR did not increase AMPK $\alpha$ 2 mRNA level. NS, no significance.

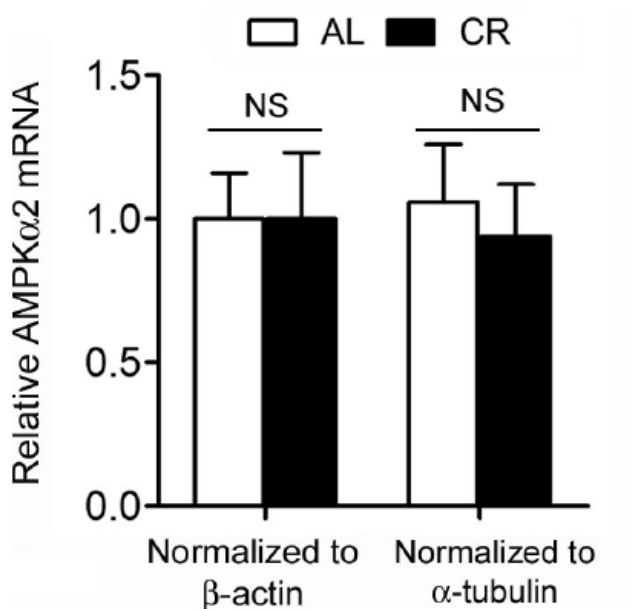

**Supplementary Figure 5.** Treatment of C2C12 cells with CR serum did not alter the phosphorylation of LKB1, a major upstream kinase of AMPK $\alpha$ 2.

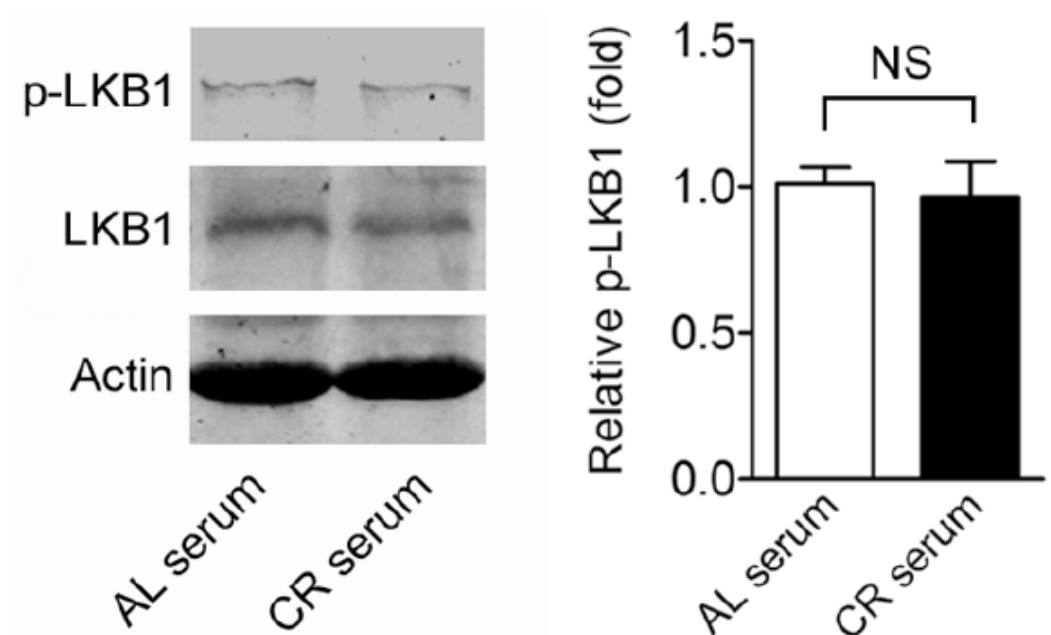

## SUPPLEMENTARY DATA

**Supplementary Figure 6.** Treatment of C2C12 cells with CR serum did not alter the mRNA expression (**A and B**) and activities (**C and D**) of PP2A and PP2C, two kinds of AMPK $\alpha$ 2 phosphatase.

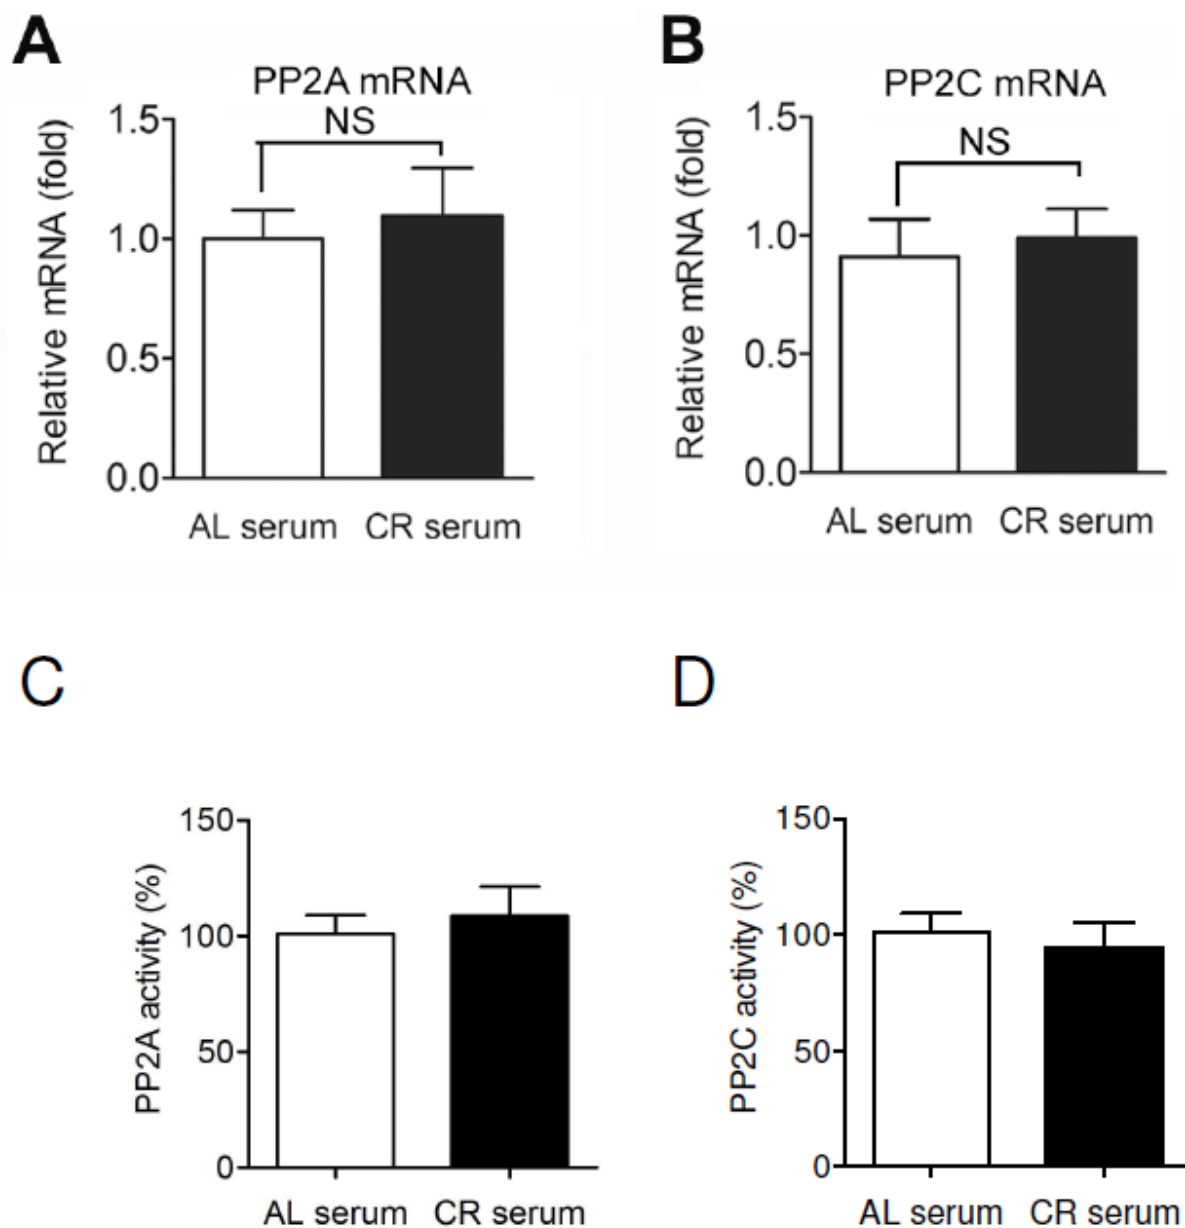

Supplement: supp_db11-1180_DB111180SupplementaryData.pdf [file supp_db11-1180_DB111180SupplementaryData.pdf]
